# Supplementary material for: Neospora caninum inhibits Lewis cancer and B16F10 melanoma lung metastasis development by activating the immune response in murine models
Source: Research Square preprint supplement (doi:10.21203/rs.3.rs-5445983/v1), 2024-12-02
Supplement: Supplementary file 1 [file d69bfd379997eab7e5fa6acf.docx]

| Gene | Primers | Sequences（5′→3′） |
| --- | --- | --- |
| β-actin | β-actin-F | CCACGAAACTACCTTCAACTCC |
| β-actin-R | GTGATCTCCTTCTGCATCCTGT |
| PD-L1 | PD-L1-F | ACTTGCTACGGGCGTTTACT |
| PD-L1-R | CTCTCCCCCTGAAGTTGCTG |
| VEGF-A | VEGF-A -F | GCACATAGAGAGAATGAGCTTCC |
| VEGF-A -R | CTCCGCTCTGAACAAGGCT |
| IFN-γ | IFN-γ-F | GCTTTGCAGCTCTTCCTCATG |
| IFN-γ-R | TCTTCCACATCTATGCCACTTGA |
| IL-12P40 | IL-12-F | TGGTTTGCCATCGTTTTGCTG |
| IL-12-R | ACAGGTGAGGTTCACTGTTTCT |
| IL-2 | IL-2-F | CGGCATGTTCTGGATTTGACT |
| IL-2-R | TCATCATCGAATTGGCACTCA |
| IL-4 | IL-4-F | TTGAACGAGGTCACAGGAGAAG |
| IL-4-R | CCTTGGAAGCCCTACAGACG |
| IL-10 | IL-10-F | GCTCTTACTGACTGGCATGAG |
| IL-10-R | CGCAGCTCTAGGAGCATGTG |
| TNF-α | TNF-α-F | AAGGGAGAGTGGTCAGGTTGCC |
| TNF-α-R | CCTCAGGGAAGAGTCTGGAAAGG |
| IL-15 | IL-15-F | ATGTTCATCAACACGTCCTGACT |
| IL-15-R | GCAGCAGGTGGAGGTACCTTAA |
| EGFR | EGFR-F | GCCATCTGGGCCAAAGATACC |
| EGFR-R | GTCTTCGCATGAATAGGCCAAT |

Table S1. Primer sequences for real-time qPCR
